# Supplementary material for: An expanded genetic toolkit for inducible expression and targeted gene silencing in Rickettsia parkeri
Source: PubMed Central journal article supplement — bioRxiv. 2024 Mar 15:2024.03.15.585227. Preprint. [Version 1] doi: 10.1101/2024.03.15.585227 (PMC10980030; doi:10.1101/2024.03.15.585227), 2024-03-15
Supplement: NIHPP2024.03.15.585227v1-supplement-1.pdf [file NIHPP2024.03.15.585227v1-supplement-1.pdf]

579 **Supplementary Figure 1. Expression of TagBFP from Tet-On using higher**  
580 **concentrations of aTc.**

581 A549 cell monolayers were infected with *R. parkeri* harboring a plasmid containing Tet-  
582 On::*tagbfp*. aTc was added 16 hpi and samples were fixed at 28 hpi. 12 h induction was  
583 used to minimize toxic effects from high concentrations of aTc. Fixed samples were  
584 imaged using spinning disk confocal fluorescent microscopy. All images were set to the

585 same minimum and maximum grey values per channel for comparison of BFP intensity.  
586 Scale bar, 5  $\mu\text{m}$ .

587

588 **Supplementary Figure 2. Expression of TagBFP from engineered aTc-responsive**  
589 **rickettsial promoters.**

590 (Left) A549 cell monolayers were infected with *R. parkeri* harboring a plasmid that  
591 expressed *tagbfp* from various promoters. The strong rickettsial promoters  $P_{ompA}$  and  
592  $P_{ompB}$  were engineered to be aTc-responsive by adding *tetO* sites into the promoters.  
593 aTc was added 4 hpi and samples were fixed at 28 hpi. The samples were subsequently  
594 imaged via spinning disk confocal fluorescent microscopy. All images were set to the  
595 same minimum and maximum grey values per channel for comparison of BFP intensity.  
596 Red arrow indicates bacterium with no detectable *tagbfp* expression, blue arrowhead  
597 indicates bacterium expressing *tagbfp*. Scale bar, 10  $\mu\text{m}$ . (Right) Schematic of rickettsial  
598 promoters engineered to be aTc-inducible. Diagrams not drawn to scale.
